# Supplementary material for: Association between genetically predicted rheumatoid arthritis and alopecia areata: a two-sample Mendelian randomization study
Source: Front Immunol. 2023 Oct 31;14:1269640. doi: 10.3389/fimmu.2023.1269640 (PMC10644376; doi:10.3389/fimmu.2023.1269640)
Supplement: Supplementary file 1 [file Table_1.xlsx]

## Sheet: Sheet1
Table1:Association between the SNPs and rheumatoid arthritis
	SNP	effect_allele.exposure	other_allele.exposure	beta.exposure	se.exposure	pos.exposure	pval.exposure	F-statistic	Variance explained
1	rs10435844	T	G	-0.0784	0.0121	123668199	9.73e-11	41.9804	0.000719779
2	rs10911902	T	C	-0.0847	0.0152	186632317	2.36e-08	31.0502	0.000532475
3	rs11123811	C	T	-0.0995	0.0114	100760172	2.01e-18	76.1766	0.00130533
4	rs112733823	T	C	0.191	0.0188	30775277	3.82e-24	103.213	0.0017678
5	rs114508013	A	G	0.488	0.0441	31868765	1.82e-28	122.447	0.00209653
6	rs115521560	C	A	0.7878	0.0364	32019382	1.29e-103	468.397	0.00797266
7	rs11574914	A	G	0.1153	0.0149	34710338	9.92e-15	59.8785	0.00102634
8	rs117026326	T	C	0.381	0.0424	74126034	2.45e-19	80.7427	0.00138346
9	rs11754264	C	T	-0.1359	0.0193	29931663	1.88e-12	49.5803	0.000849974
10	rs11889341	T	C	0.1466	0.0129	191943742	4.32e-30	129.144	0.00221094
11	rs12126142	A	G	-0.0751	0.0116	154425456	1.01e-10	41.913	0.000718625
12	rs1234313	G	A	0.0797	0.0133	173166247	1.9e-09	35.9086	0.000615739
13	rs12466919	T	C	0.1025	0.0152	61092858	1.59e-11	45.4722	0.000779601
14	rs12530098	T	C	0.1382	0.0204	14107197	1.35e-11	45.8924	0.0007868
15	rs12918327	T	C	0.0867	0.0157	30626616	3.04e-08	30.4947	0.000522953
16	rs13103285	T	C	0.0989	0.0131	10726520	4.29e-14	56.9948	0.000976959
17	rs1355208	G	A	0.0818	0.0119	30445322	6.77e-12	47.2496	0.000810049
18	rs139395255	G	A	0.3833	0.0235	31449736	8.68e-60	266.028	0.00454375
19	rs146305655	A	G	-0.4379	0.0452	32268953	3.29e-22	93.8552	0.00160777
20	rs1538981	T	C	0.0671	0.0114	31411355	4.42e-09	34.6434	0.000594057
21	rs1571878	T	C	-0.1539	0.0116	167540842	4.13e-40	176.014	0.00301094
22	rs1611236	A	G	-0.1165	0.0131	29748690	4.54e-19	79.085	0.0013551
23	rs1883832	C	T	0.1052	0.0127	44746982	1.13e-16	68.6134	0.00117588
24	rs1893592	C	A	-0.0976	0.0132	43855067	1.48e-13	54.6685	0.00093712
25	rs1950897	T	C	0.1069	0.0144	68760141	1.02e-13	55.1081	0.000944649
26	rs2069235	A	G	0.1296	0.014	39747780	1.69e-20	85.6918	0.00146814
27	rs2073609	C	T	0.1029	0.0182	45707976	1.47e-08	31.9649	0.000548151
28	rs2076616	G	A	-0.0885	0.0135	17412501	6.2e-11	42.9738	0.0007368
29	rs212389	A	G	0.1058	0.0147	159489791	6.66e-13	51.799	0.000887977
30	rs2233424	T	C	0.1964	0.0187	44233921	6.49e-26	110.302	0.00188899
31	rs2258734	A	G	-0.0921	0.0123	2483961	6.04e-14	56.0653	0.000961041
32	rs2275806	A	G	-0.0725	0.0122	8095340	2.51e-09	35.3136	0.000605542
33	rs2301888	A	G	-0.1282	0.0121	17672730	3.75e-26	112.251	0.0019223
34	rs244685	G	T	-0.089	0.0144	133423890	6.04e-10	38.198	0.00065497
35	rs28411352	T	C	0.0914	0.0136	38278579	1.66e-11	45.1648	0.000774335
36	rs2847297	G	A	0.0903	0.0119	12797694	2.65e-14	57.5793	0.000986969
37	rs2918392	C	T	0.0668	0.0122	10704797	4.62e-08	29.9791	0.000514115
38	rs3087243	A	G	-0.1261	0.0124	204738919	3.32e-24	103.412	0.0017712
39	rs3134883	A	G	0.0991	0.0125	6100725	1.98e-15	62.851	0.00107723
40	rs34046593	A	G	0.1422	0.017	26111593	7.17e-17	69.9659	0.00119903
41	rs34502849	A	G	-0.0851	0.014	72411787	1.07e-09	36.9478	0.000633546
42	rs3757387	C	T	0.1236	0.0137	128576086	1.87e-19	81.3918	0.00139457
43	rs3761959	T	C	0.0744	0.0115	157669278	9.64e-11	41.8538	0.000717611
44	rs3806624	G	A	0.0863	0.0131	27764623	3.94e-11	43.3974	0.000744057
45	rs403214	G	A	-0.0914	0.0146	102603701	3.96e-10	39.1897	0.000671963
46	rs42034	G	A	0.0871	0.0153	92239144	1.28e-08	32.407	0.000555729
47	rs4409785	C	T	0.0982	0.017	95311422	7.85e-09	33.3665	0.000572173
48	rs4602367	G	A	0.075	0.0117	17053499	1.76e-10	41.09	0.000704523
49	rs4717901	C	A	0.249	0.0349	74016979	9.52e-13	50.9018	0.000872608
50	rs4795400	T	C	0.0743	0.012	38067020	5.86e-10	38.3354	0.000657325
51	rs4963581	A	G	0.0856	0.0156	24813281	3.75e-08	30.1081	0.000516327
52	rs5020946	T	G	0.6519	0.0169	32450089	1e-200	1487.9	0.0248938
53	rs502919	C	T	0.0829	0.0134	6517167	6.17e-10	38.2723	0.000656244
54	rs5754104	A	G	0.0891	0.0139	21916361	1.36e-10	41.0876	0.000704483
55	rs6011186	T	C	-0.1074	0.0171	62484008	3.19e-10	39.4459	0.000676353
56	rs61828284	T	C	-0.2018	0.0348	173299743	6.33e-09	33.6255	0.000576612
57	rs62422878	T	C	0.1037	0.0176	106676470	3.57e-09	34.715	0.000595284
58	rs6421571	C	T	0.134	0.0178	118743772	5.57e-14	56.6702	0.0009714
59	rs660442	A	G	-0.1067	0.0175	64042997	1.11e-09	37.1739	0.000637421
60	rs6679677	A	C	0.591	0.023	114303808	1.41e-145	660.244	0.0112015
61	rs7097397	A	G	-0.0847	0.012	50025396	1.42e-12	49.8184	0.000854051
62	rs71508903	T	C	0.1487	0.0143	63779871	3.13e-25	108.127	0.00185181
63	rs71565312	A	G	0.699	0.0402	32179319	1.11e-67	302.334	0.00516067
64	rs7170107	T	C	0.1366	0.0158	70010647	6.11e-18	74.7433	0.0012808
65	rs7206670	T	G	0.0701	0.0119	11833886	4.14e-09	34.6998	0.000595024
66	rs740122	A	G	-0.0782	0.0134	28166442	5.37e-09	34.0556	0.000583984
67	rs76153210	T	C	0.1597	0.0205	44284508	6.83e-15	60.6858	0.00104016
68	rs7731626	A	G	-0.1956	0.0184	55444683	1.94e-26	113.002	0.00193514
69	rs7749323	A	G	0.2835	0.0253	138230389	3.47e-29	125.56	0.00214972
70	rs8032939	C	T	0.1244	0.0123	38834033	4.47e-24	102.286	0.00175194
71	rs8126756	C	T	-0.0823	0.0137	34775444	1.81e-09	36.0864	0.000618786
72	rs9258357	C	T	0.1874	0.0194	29751129	5.77e-22	93.3084	0.00159842
73	rs9271365	G	T	0.4888	0.0128	32586794	1e-200	1458.24	0.0244096
74	rs9405192	A	G	-0.089	0.0137	382537	9.26e-11	42.2011	0.000723561
75	rs9532434	C	T	0.114	0.0126	40355913	1.94e-19	81.8566	0.00140252
76	rs9693589	A	G	0.1127	0.0128	11348961	1.5e-18	77.5199	0.00132832
77	rs9943599	T	C	0.083	0.0131	9752741	2.7e-10	40.142	0.00068828
average of the F statistics								116.375
Total Variance Explained									0.152
